# Supplementary material for: Stimulus-Dependent State Transition between Synchronized Oscillation and Randomly Repetitive Burst in a Model Cerebellar Granular Layer
Source: PLoS Comput Biol. 2011 Jul 14;7(7):e1002087. doi: 10.1371/journal.pcbi.1002087 (PMC3136428; doi:10.1371/journal.pcbi.1002087)
Supplement: Table S1 — Tabular description of the present network model. (DOC) [file pcbi.1002087.s004.doc]

**Table S1 :** Tabular description of the present network model.

| Neuron Model | |
| --- | --- |
| Name | Granule cell　(grc) |
| Type | Hodgkin-Huxley |
| Dynamics | with |
| Voltage-gated channels | Exponential(Exp):  Sigmoid(Sig):  Linoid(Lin):  KCα:  KCβ: |
|  | with |
| Calcium pools | with |
| Mossy fiber input | We regarded mossy fiber input as current injected to all grcs. |
| Golgi cell input | Each model grc randomly receives connections from Gocs within grc dendritic arborization diameter (the mean and standard deviation of the connection is 6.11 and 2.57) (Fig.1). |

| Neuron Model | |
| --- | --- |
| Name | Golgi cell (Goc) |
| Type | Hodgkin-Huxley |
| Dynamics | with |
| Voltage-gated channels | Exponential(Exp):  Sigmoid(Sig):  Linoid(Lin):  KCα:  KCβ: |
|  | with |
|  | with |
| Calcium pools | with |
| granule cell input | Each model Goc randomly connected from closed PFs (the mean and standard deviation of the connection is 26.80 and 6.50) (Fig.1). |

| Parameter values of voltage-gated channels for model grc and Goc | | | | | | | | | | | |
| --- | --- | --- | --- | --- | --- | --- | --- | --- | --- | --- | --- |
| Channel | (mV) | *P* |  |  |  | A  (ms-1) | B  (ms-1) | C  (ms-1) | (mV) | Constraints | (nS) |
| NaF | 55 | 3 | m |  | Exp | 7.5 | 0.081 |  | -39 |  | grc  172  Goc  1,131 |
|  |  |  |  |  | Exp | 7.5 | -0.066 |  | -39 |  |
|  |  |  | h |  | Exp | 0.6 | -0.089 |  | -50 |  |
|  |  |  |  |  | Exp | 0.6 | 0.089 |  | -50 |  |
| Kdr | -90 | 4 | m |  | Exp | 0.85 | 0.073 |  | -38 |  | grc |
|  |  |  |  |  | Exp | 0.85 | -0.018 |  | -38 |  | 28  Goc  192 |
|  |  |  | h |  | Exp | 3e-4 | -0.08 | 35e-4 | -46 |  |
|  |  |  |  |  | Sig | 5.5e-3 | -0.0807 |  | -44 |  |
| CaL | 80 | 2 | m |  | Sig | 8.0 | -0.072 |  | 5 |  | grc  2.9  Goc  23.5 |
|  |  |  |  |  | Lin | 0.1 | 0.2 |  | -8.9 |  |
|  |  |  | h |  | Exp | 0.025 | -0.05 |  | -60 |  |
|  |  |  |  |  | Exp | -0.025 | -0.05 | 0.025 | -60 |  |
| H | -42 | 1 | m |  | Exp | 4e-3 | -0.0909 |  | -75 |  | grc 97.1  Goc 4.85 |
|  |  |  |  |  | Exp | 4e-3 | 0.0909 |  | -75 |  |
| KA | -90 | 3 | m |  | Exp | 0.41 | 1/42.8 | 0.167 | -43.5 |  | grc  3.6  Goc  14.8 |
|  |  |  |  |  | Sig | 1 | -1/19.8 |  | -46.7 |  |
|  |  |  | h |  |  | | | | | |
|  |  |  |  |  | Sig | 1 | 1/8.4 |  | -78.8 |  |
| KC | -90 | 1 | m |  |  | 12.5 | -0.085 | 1.5e-3 |  |  | grc 56.5  Goc 16.2 |
|  |  |  |  |  |  | 7.5 | -0.077 | 150e-6 |  |  |

| Neuron Model | |
| --- | --- |
| Name | Purkinje cell　(PC) |
| Type | Hodgkin-Huxley |
| Dynamics | with |
| Voltage-gated channels | Exponential(Exp):  Sigmoid(Sig):  Linoid(Lin): |
|  | with |
| Parallel fiber input | Model PC connected with all grcs. |

| Parameter values of voltage-gated channels for model PC | | | | | | | | | | | |
| --- | --- | --- | --- | --- | --- | --- | --- | --- | --- | --- | --- |
| Channel | (mV) | *P* |  |  |  | A  (ms-1) | B  (ms-1) | C  (ms-1) | (mV) | Constraints | (nS) |
| Na+ | 55 | 3 | m |  | Lin | 1.0 | -0.1 |  | 35 |  | 120 |
|  |  |  |  |  | Exp | 4.0 | -1/18 |  | 60 |  |
|  |  |  | h |  | Exp | 0.07 | -0.05 |  | 60 |  |
|  |  |  |  |  | Sig | 1.0 | -0.1 |  | 30 |  |
| K+ | -72 | 3 | m |  | Lin | -0.01 | -0.01 |  | 50 |  |  |
|  |  |  |  |  | Exp | 0.125 | -0.0125 |  | 60 |  | 36 |
|  |  |  | h |  | Lin | -0.01 | -0.01 |  | 50 |  |
|  |  |  |  |  | Exp | 0.125 | -0.0125 |  | 60 |  |
